# Supplementary material for: Effect of solvent on the crystal phase, morphology, and sodium storage performance of FeSe2
Source: Royal Society of Chemistry journal article supplement (doi:10.1039/d3ta01432k), 2023-01-01
Supplement: d3ta01432k1.pdf [file d3ta01432k1.pdf]

## Effect of solvent on the crystal phase, morphology, and sodium storage performance of FeSe<sub>2</sub>

Manman Ren <sup>a\*#</sup>, Haoting Zang <sup>a#</sup>, Shilei Cao <sup>a</sup>, Hongling Guo <sup>a</sup>, Jihui Zhang <sup>a</sup>,

Weiliang Liu <sup>a</sup>, Jinshui Yao <sup>a</sup>, Xu Zhang <sup>b\*</sup>, Zhen Zhou <sup>b</sup>

<sup>a</sup> School of Materials Science and Engineering, Qilu University of Technology (Shandong Academy of Sciences), Jinan 250353, PR China

<sup>b</sup> Interdisciplinary Research Center for Sustainable Energy Science and Engineering (IRC4SE<sup>2</sup>), School of Chemical Engineering, Zhengzhou University, Zhengzhou 450001, P. R. China.

### Materials characterization

XRD pattern was conducted on SHMADZUXRD-6100AS with Cu K $\alpha$  X-ray radiation ( $\lambda=0.15406$  nm). The chemical composition of the FeSe<sub>2</sub> (ESCALAB 250 X-ray spectrometer with Al K $\alpha$  X-ray source) was analyzed by X-ray photoelectron spectroscopy (XPS). The morphology and microstructure details of the samples was investigated by Scanning electron microscopy (SEM, ZEISS SUPRATM 55) and transmission electron microscopy (TEM, FEI-TECNAI-G20). Raman spectra was characterized by LabRam HR confocal laser microRaman spectrometer. Brunauer-Emmet-Teller (BET) surface areas were characterized by nitrogen adsorption with Autosorb-iQ specific surface area instrument.

### Electrochemical measurements

Test electrodes were composed of FeSe<sub>2</sub> (80%), acetylene black (10%), and polyvinylidene fluoride (10%). Sodium metal and microporous glass fiber were used as

the counter electrodes and separator. The electrolyte was 1.0 M NaSO<sub>3</sub>CF<sub>3</sub> dissolved in the diglyme. Galvanostatic charge/discharge tests of 0.3-3.0 V (vs. Na<sup>+</sup>/Na) were carried out on the Neware battery testing system. The cyclic voltammetry (CV) and electrochemical impedance spectroscopy (EIS) were studied by CHI760 E electrochemical workstation. The CV curves at different scan rates were tested in the potential range of 0.3-3.0 V (vs. Na<sup>+</sup>/Na). EIS was studied in the frequency range of 100 -0.01 Hz with an amplitude of 5 mV. The galvanostatic discharge/charge tests and GITT were conducted on NEWARE battery test systems, with a potential range of 0.3~3.0 V (vs. Na<sup>+</sup>/Na).

### **Computational methods**

The spin-polarized density functional theory (DFT) calculations were performed using Vienna ab initio simulation package (VASP) with the plane-wave techniques.<sup>1</sup> The Perdew-Burke-Ernzerhof (PBE) functional within the generalized gradient approximation (GGA) was adopted to describe the exchange-correlation interaction.<sup>2</sup> A kinetic cutoff energy of 450 eV was used for the plane-wave basis set. In order to accurately deal with the long-rang van der Waals (vdW) interactions, the zero damping DFT-D3 method of Grimme was used.<sup>3</sup> A vacuum layer of 20 Å was inserted to eliminate the artificial interactions between the periodically repeated layers. A Monkhorst-Pach scheme with a *K*-point mesh of 0.03 1/Å density was used in the computations.<sup>4</sup> According to our experiments, FeSe<sub>2</sub>, (101) and (110) surfaces were built. For the computations of FeSe<sub>2</sub> surfaces, the lower one-third atoms were fixed and other atoms were fully relaxed. The adsorption energy ( $E_{\text{ads}}$ ) of Na atom on the FeSe<sub>2</sub>

surface was calculated from the equation:

$$E_{\text{ads}} = E_{\text{Na-surface}} - E_{\text{surface}} - E_{\text{Na}}$$

in which  $E_{\text{Na-surface}}$  is the total energy of Na atom adsorbed on the FeSe<sub>2</sub> surface and  $E_{\text{surface}}$  and  $E_{\text{Na}}$  are the energy of FeSe<sub>2</sub> surface and Na atom in Na metal bulk, respectively. The Na migration pathways on the FeSe<sub>2</sub> surfaces and corresponding energy barriers were calculated based on the climbing-image nudged elastic band (CI-NEB) method.<sup>5</sup>

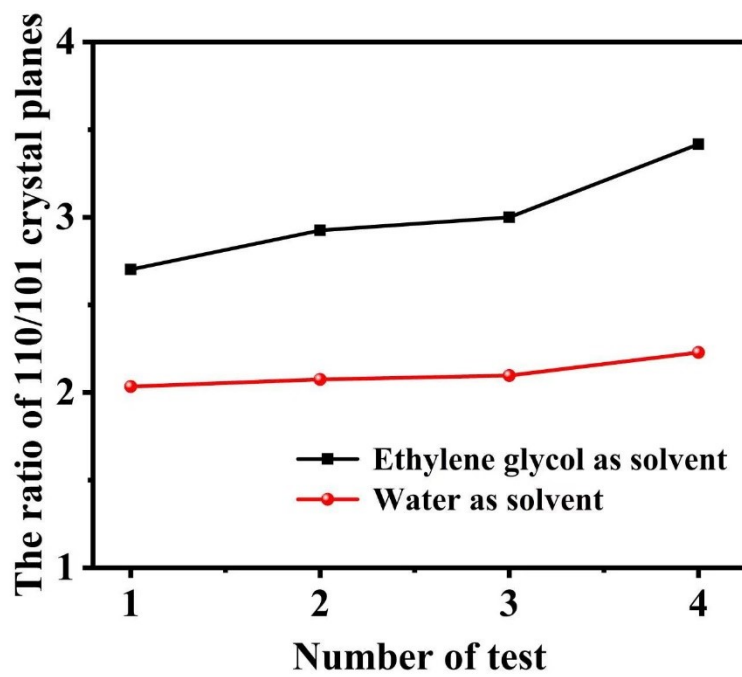

Fig. S1 The ratio of 110/101 crystal planes in FeSe<sub>2</sub>/rGO-EG

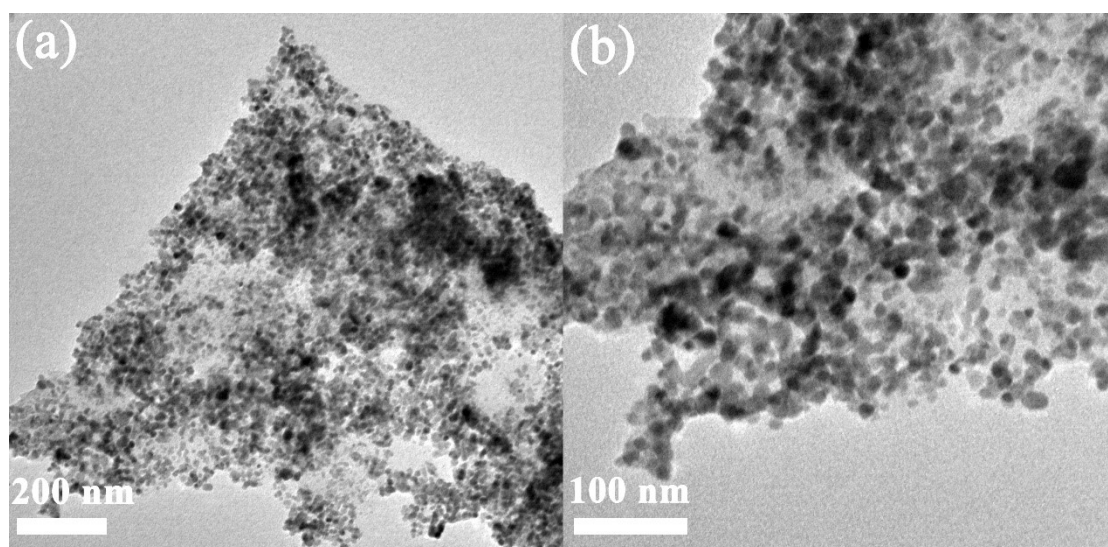

Fig. S2 TEM images of Fe<sub>3</sub>O<sub>4</sub>/rGO

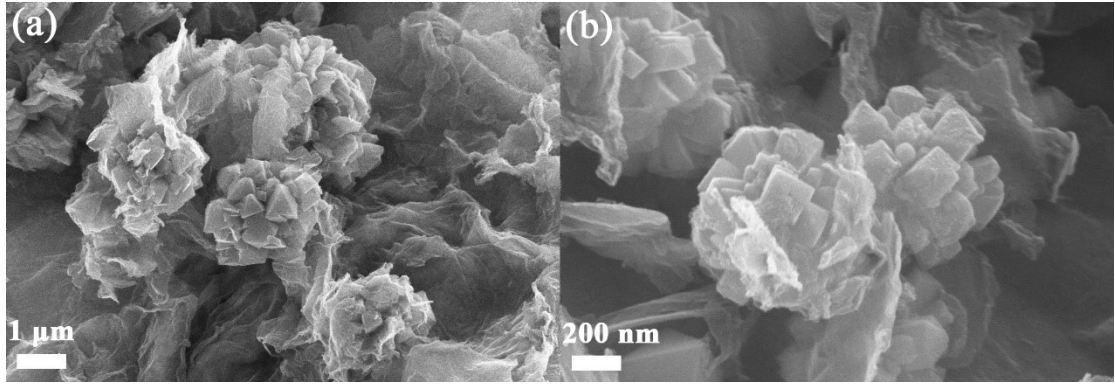

Fig. S3 SEM images of FeSe<sub>2</sub>/rGO-EG at different solvothermal reaction time (a) 5h and (b) 15h

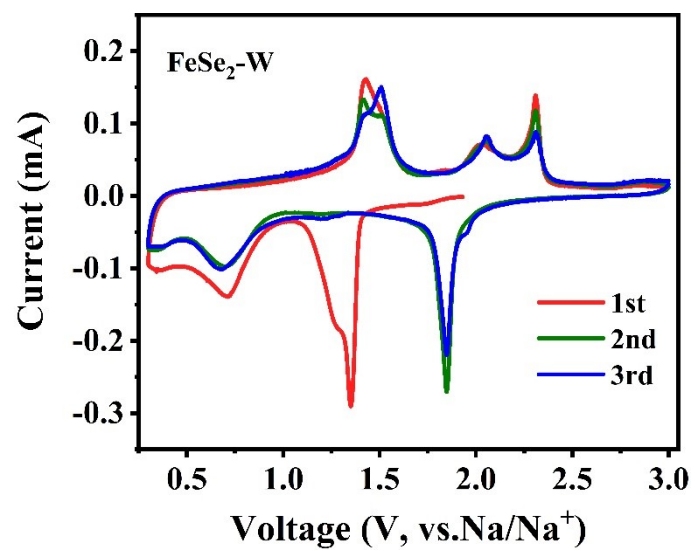

Fig. S4 CV profiles of the FeSe<sub>2</sub>/rGO-W electrode at 0.1 mV s<sup>-1</sup>

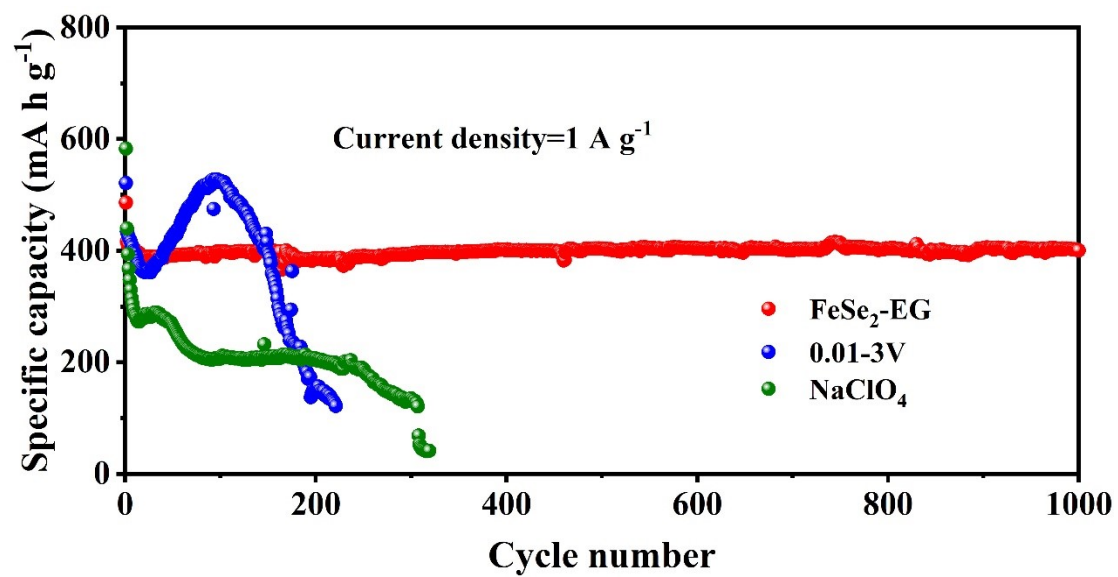

Fig. S5 Long cycling performance of the FeSe<sub>2</sub>/rGO-EG electrode at 1 A g<sup>-1</sup> under different situations.



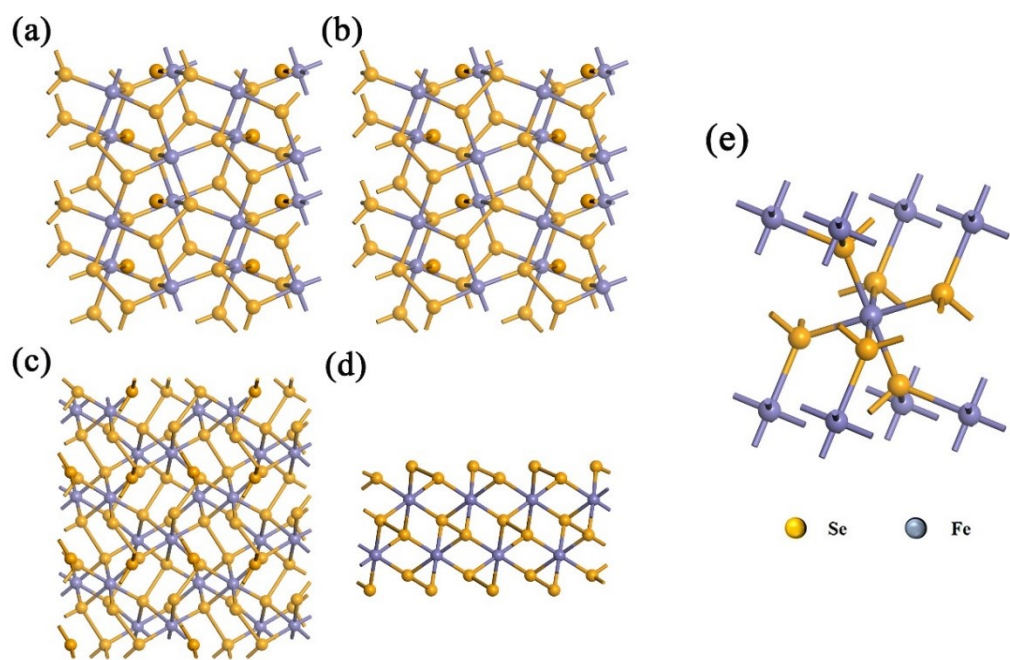

Fig. S6 (a, b) Optimized atomic configuration of top and side view of (110) plane; (c,d) Optimized atomic configuration of top and side view of (101) plane; (e) Optimized atomic configuration of  $\text{FeSe}_2$ .

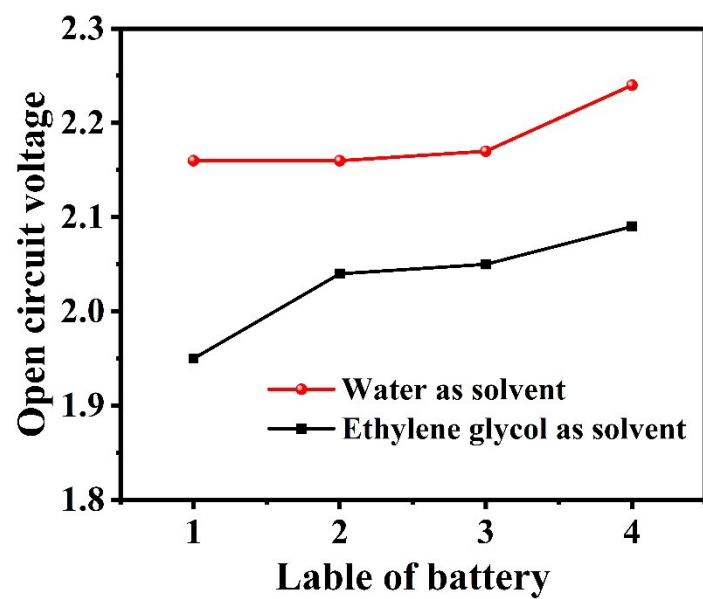

Fig. S7 Open circuit voltage of the FeSe<sub>2</sub>/rGO-EG and FeSe<sub>2</sub>/rGO-W electrodes

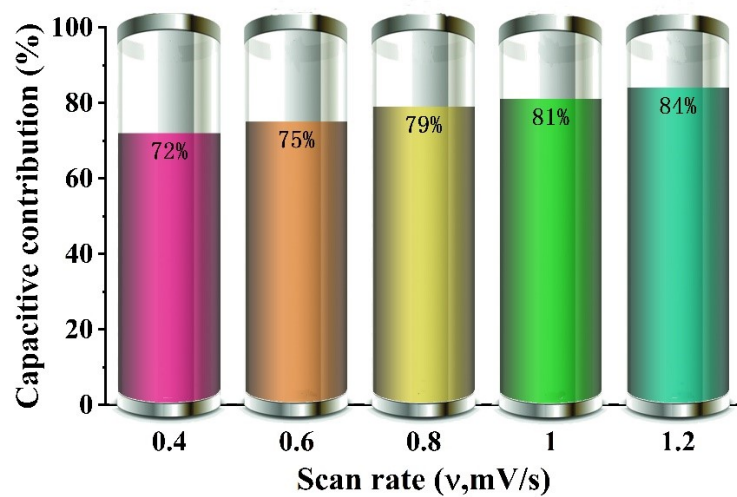

Fig. S8 Capacitive contribution to the total capacity of the FeSe<sub>2</sub>/rGO-W electrodes at various scan rates

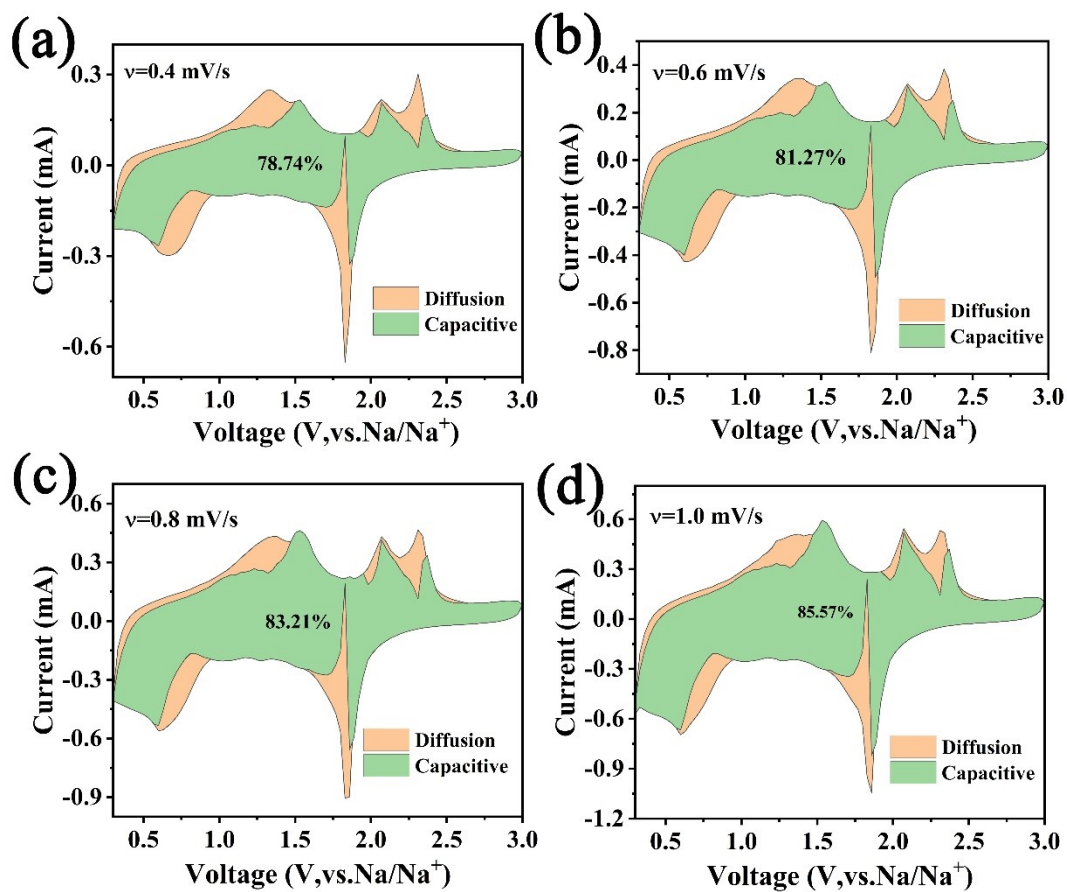

Fig. S9 Diffusion-controlled and capacitive contribution of the FeSe<sub>2</sub>/rGO-EG electrodes at 0.4 mV s<sup>-1</sup> (a), 0.6 mV s<sup>-1</sup> (b), 0.8 mV s<sup>-1</sup> (c), 1.0 mV s<sup>-1</sup> (d).

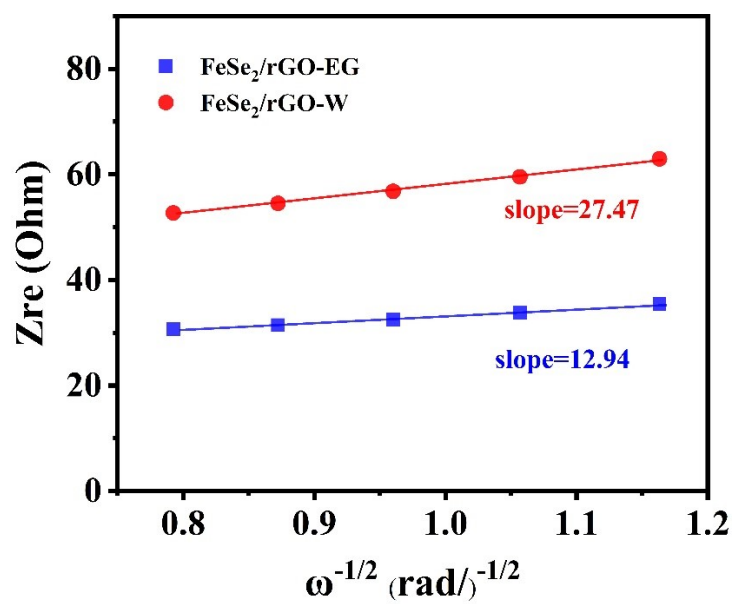

Fig. S10 Linear fits in low-frequency regions of the FeSe<sub>2</sub>/rGO-EG and FeSe<sub>2</sub>/rGO-W

Table S1 Comparison of the electrochemical performances of the FeSe<sub>2</sub>/rGO-EG and other FeSe<sub>2</sub>-based anode material.

| Samples                        | Current density (A /g) | Cycle number (n) | Capacity (mAh /g) | Solvent                              | Ref       |
|--------------------------------|------------------------|------------------|-------------------|--------------------------------------|-----------|
| <b>FeSe<sub>2</sub>@C</b>      | 1.0                    | 200              | 359               | H <sub>2</sub> O / isopropyl alcohol | 6         |
| <b>O-FeSe<sub>2</sub> NSs</b>  | 1.0                    | 700              | 268               | Oleylamine                           | 7         |
| <b>FeSe<sub>2</sub>@C/NG</b>   | 0.5                    | 160              | 350               | H <sub>2</sub> O                     | 8         |
| <b>FeSe<sub>2</sub>@GC-rGO</b> | 1.0                    | 150              | 393               | DMF                                  | 9         |
| <b>FeSe<sub>2</sub>-HGCNS</b>  | 0.5                    | 100              | 425               | DMF                                  | 10        |
| <b>FeSe<sub>2</sub> NPs/CB</b> | 0.8                    | 300              | 450               | Oleylamine /1-octadecene             | 11        |
| <b>FCSe@C@void @C</b>          | 0.4                    | 400              | 282               | H <sub>2</sub> O                     | 12        |
| <b>FeSe<sub>x</sub>-rGO</b>    | 1.0                    | 1000             | 311               | H <sub>2</sub> O                     | 13        |
| <b>FeSe<sub>2</sub>/rGO-EG</b> | 1.0                    | 1000             | 400               | Ethylene glycol                      | This work |

## References:

1. G. Kresse and J. Furthmüller, *Phys Rev B*, 1996, **54**, 11169-11186.
2. J. P. Perdew, K. Burke and M. Ernzerhof, *Phys Rev Lett*, 1996, **77**, 3865-3868.
3. S. Grimme, J. Antony, S. Ehrlich and H. Krieg, *J Chem Phys*, 2010, **132**, 154104.
4. H. J. Monkhorst and J. D. Pack, *Phys Rev B*, 1976, **13**, 5188-5192.
5. G. Henkelman and H. Jónsson, *J Chem Phys*, 2000, **113**, 9978-9985.
6. T. Wang, W. Guo, G. Wang, H. Wang, J. Bai and B. Wang, *Journal of Alloys and Compounds*, 2020, **834**, 155265
7. Z.-Q. Wang, B. Zeng, D. Zhou, L. Tai, X.-D. Liu and W.-M. Lau, *Chemical Engineering Journal*, 2022, **428**, 132637
8. S. H. Yang, S. K. Park and Y. C. Kang, *International Journal of Energy Research*, 2021, **45**, 20909-20920.
9. J. S. Cho, J. K. Lee and Y. C. Kang, *Sci Rep*, 2016, **6**, 23699.
10. J.-S. Park, S. Y. Jeong, K. M. Jeon, Y. C. Kang and J. S. Cho, *Chemical Engineering Journal*, 2018, **339**, 97-107.
11. F. Zhao, S. Shen, L. Cheng, L. Ma, J. Zhou, H. Ye, N. Han, T. Wu, Y. Li and J. Lu, *Nano Lett*, 2017, **17**, 4137-4142.
12. J. Wang, B. Wang, H. Sun, G. Wang, J. Bai and H. Wang, *Energy Storage Materials*, 2022, **46**, 394-405.
13. G. D. Park, J. S. Cho, J. K. Lee and Y. C. Kang, *Sci Rep*, 2016, **6**, 22432.
